# Supplementary material
Source: PubMed Central journal article supplement (PMC8356679)
Supplement: fmc-13-193-s1.pdf [file fmc-13-193-s1.pdf]

**Table S1. FDA approved drugs with a known covalent mechanism of action<sup>a</sup>**

| Active ingredient <sup>b</sup> | Drug brand name  | Sponsor <sup>c</sup> | Approval year | Target                                       | Indication                                                                | Treatment area          | Warhead <sup>d</sup>                     | Reversibility      | Target Residue                    |
|--------------------------------|------------------|----------------------|---------------|----------------------------------------------|---------------------------------------------------------------------------|-------------------------|------------------------------------------|--------------------|-----------------------------------|
| Acetylsalicylic acid           | Aspirin          | Bayer                | 1900          | Cyclooxygenases                              | Fever, pain, inflammation                                                 | Anti-inflammatory       | Acetyl ester                             | Irreversible       | Ser                               |
| Propylthiouracil               | Propylthiouracil | Dava Pharms Inc      | 1947          | Thyroxine-5-deiodinase                       | Hyperthyroidism                                                           | Hyperthyroidism         | Thio-dihydro-pyrimidinedione             | Irreversible       | Sec <sup>e</sup>                  |
| Mechlorethamine                | Mustargen        | Recordati Rare       | 1949          | DNA (alkylation)                             | T-cell lymphoma                                                           | Cancer                  | Aziridinium (prodrug)                    | Irreversible       | Purines (N7)                      |
| Disulfiram                     | Antabuse         | Teva                 | 1951          | Aldehyde dehydrogenase                       | Alcoholism                                                                | Addiction               | Dithiocarbamate                          | Irreversible       | Cys                               |
| Penicillin G                   | Bicillin         | Wyeth Ayerst         | 1951          | PBP                                          | Bacterial infections                                                      | Anti-microbial          | $\beta$ -lactam                          | Slowly reversible* | Ser                               |
| Isoniazid                      | Nydrazid         | Bristol Myers Squibb | 1952          | Enol-acyl carrier protein reductase          | Mycobacteria                                                              | Anti-microbial          | Acyl hydrazide derived radical (prodrug) | Irreversible       | NADH                              |
| Phenoxybenzamine               | Dibenzyline      | Concordia            | 1953          | $\alpha$ -adrenergic receptor                | Pheochromocytoma                                                          | Cardiovascular diseases | Aziridinium (prodrug)                    | Irreversible       | Cys                               |
| Warfarin                       | Coumadin         | Bristol Myers Squibb | 1954          | Vitamin K reductase                          | Anti-coagulant                                                            | Cardiovascular diseases | Lactone                                  | Irreversible       | Cys                               |
| Busulfan                       | Myleran          | Aspen Global Inc     | 1954          | DNA (alkylation)                             | Chronic myelogenous leukemia                                              | Cancer                  | Mesylate                                 | Irreversible       | Purines (N7)                      |
| Penicillin V                   | V-cillin         | Lilly                | 1955          | PBP                                          | Bacterial infections                                                      | Anti-microbial          | $\beta$ -lactam                          | Slowly reversible* | Ser                               |
| Chlorambucil                   | Leukeran         | Aspen Global Inc     | 1957          | DNA (alkylation)                             | Lymphoma and Hodgkin's disease                                            | Cancer                  | Aziridinium (prodrug)                    | Irreversible       | Purines (N7)                      |
| Thiotepa                       | Thiotepa         | Immunex              | 1959          | DNA (alkylation)                             | Ovarian and breast adenocarcinoma                                         | Cancer                  | Aziridine                                | Irreversible       | Purines (N7)                      |
| Cyclophosphamide               | Cytoxan          | Baxter               | 1959          | DNA (alkylation)                             | Lymphoma, multiple myeloma                                                | Cancer                  | Aziridinium (prodrug)                    | Irreversible       | Purines (N7)                      |
| Ampicillin                     | Penbritin        | Wyeth Ayerst         | 1961          | PBP                                          | Bacterial infections                                                      | Anti-microbial          | $\beta$ -lactam                          | Slowly reversible* | Ser                               |
| Fluorouracil                   | Fluorouracil     | Spetrum Pharms       | 1962          | Thymidylate synthase                         | Metastatic gastrointestinal adenocarcinoma                                | Cancer                  | Dihydro-pyrimidinedione                  | Irreversible       | Cys, Tetrahydrofolate cofactor    |
| D-cycloserine                  | Seromycin        | Purdue               | 1964          | Alanine racemase, D-alanine:D-alanine ligase | Bacterial infections                                                      | Anti-microbial          | Amine                                    | Irreversible       | PLP cofactor (imine intermediate) |
| Melphalan                      | Alkeran          | Apotex               | 1964          | DNA (alkylation)                             | Multiple myeloma                                                          | Cancer                  | Aziridinium (prodrug)                    | Irreversible       | Purines (N7)                      |
| Floxuridine                    | Fudr             | Hospira              | 1970          | Thymidylate synthase                         | Metastatic gastrointestinal adenocarcinoma                                | Cancer                  | Dihydro-pyrimidinedione                  | Irreversible       | Cys, Tetrahydrofolate cofactor    |
| Amoxicillin                    | Amoxil           | GSK                  | 1974          | PBP                                          | Bacterial infections                                                      | Anti-microbial          | $\beta$ -lactam                          | Slowly reversible* | Ser                               |
| Carbidopa                      | Synmet           | Merck                | 1975          | PLP-dependent decarboxylases                 | Parkinson's disease                                                       | CNS diseases            | Hydrazine                                | Irreversible       | PLP                               |
| Dacarbazine                    | Dtic-dome        | Bayer                | 1975          | DNA (alkylation)                             | Melanoma, Hodgkin's disease                                               | Cancer                  | Methyldiazonium (prodrug)                | Irreversible       | Purines (N7)                      |
| Lomustine                      | Gleostine        | Corden Pharma        | 1976          | DNA, proteins (alkylation)                   | Brain tumors, multiple myeloma, Hodgkin's disease, non-Hodgkin's lymphoma | Cancer                  | Isocyanate, diazohydroxide (prodrug)     | Irreversible       | DNA, proteins                     |
| Carmustine                     | Bicnu            | Emcure Pharms LTD    | 1977          | DNA, proteins (alkylation)                   | Brain tumors, Hodgkin's disease                                           | Cancer                  | Isocyanate, diazohydroxide (prodrug)     | Irreversible       | DNA, proteins                     |
| Cisplatin                      | Platinol         | HQ SPCLT Pharma      | 1978          | DNA (crosslinker)                            | Ovarian and testicular cancer, bladder carcinoma                          | Cancer                  | Pt (II)                                  | Irreversible       | Purines (N7)                      |
| Cefaclor                       | Ceclor           | Lilly                | 1979          | PBP                                          | Bacterial infections                                                      | Anti-microbial          | $\beta$ -lactam                          | Slowly reversible* | Ser                               |
| Trifluridine                   | Viroptic         | Monarch Pharms       | 1980          | Thymidylate synthase                         | keratitis and keratoconjunctivitis by HPV                                 | Anti-microbial          | Dihydro-pyrimidinedione (suicidal)       | Irreversible       | Cys, Tyr                          |
| Estramustine                   | Emcyt            | Pharmacia and Upjohn | 1981          | DNA (alkylation)                             | Prostate cancer                                                           | Cancer                  | Aziridinium (prodrug)                    | Irreversible       | Purines (N7)                      |
| Streptozocin                   | Zanosar          | Teva                 | 1982          | DNA, proteins (alkylation)                   | Pancreatic cancer                                                         | Cancer                  | Isocyanate, diazohydroxide (prodrug)     | Irreversible       | DNA, proteins                     |

|                   |                          |                      |      |                                                    |                                                                          |                            |                                 |                    |                                 |
|-------------------|--------------------------|----------------------|------|----------------------------------------------------|--------------------------------------------------------------------------|----------------------------|---------------------------------|--------------------|---------------------------------|
| Ceftriaxone       | Rocephin                 | Roche                | 1984 | PBP                                                | Bacterial infections                                                     | Anti-microbial             | $\beta$ -lactam                 | Slowly reversible* | Ser                             |
| Clavulanic acid   | Augmentin                | Neopharma            | 1984 | $\beta$ -lactamases                                | $\beta$ -lactam resistant bacterial infections                           | Anti-microbial             | $\beta$ -lactam (suicidal)      | Irreversible       | Ser                             |
| Cephalexin        | Keflex                   | Pragma               | 1986 | PBP                                                | Bacterial infections                                                     | Anti-microbial             | $\beta$ -lactam                 | Slowly reversible* | Ser                             |
| Sulbactam         | Unasyn                   | Pfizer               | 1986 | $\beta$ -lactamases                                | Bacterial infections                                                     | Anti-microbial             | $\beta$ -lactam (suicidal)      | Irreversible       | Ser                             |
| Ifosfamide        | Ifex                     | Baxter               | 1987 | DNA (alkylation)                                   | Testicular cancer                                                        | Cancer                     | Aziridinium (prodrug)           | Irreversible       | Purines (N7)                    |
| Cefuroxime axetil | Ceftin                   | GSK                  | 1987 | PBP                                                | Bacterial infections                                                     | Anti-microbial             | $\beta$ -lactam                 | Slowly reversible* | Ser                             |
| Omeprazole        | Prilosec                 | Astrazeneca          | 1989 | H+/K+ ATPase                                       | Esophageal reflux and heartburn                                          | Gastro-intestinal diseases | Sulfenic acid (prodrug)         | Irreversible       | Cys                             |
| Selegiline        | Selegiline hydrochloride | Somerset             | 1989 | MAO-B                                              | Parkinson's disease                                                      | CNS diseases               | Propargylamine (suicidal)       | Irreversible       | FAD (N5)                        |
| Carboplatin       | Paraplatin               | Corden Pharma        | 1989 | DNA (crosslinker)                                  | Ovarian cancer                                                           | Cancer                     | Pt (II)                         | Irreversible       | Purines (N7)                    |
| Eflornithine      | Ornidyl                  | Sanofi               | 1990 | Ornithine decarboxylase                            | African trypanosomiasis                                                  | Anti-microbial             | Difluoromethyl group (suicidal) | Irreversible       | Cys                             |
| Altretamine       | Hexalen                  | Eisai                | 1990 | DNA (alkylation)                                   | Ovarian cancer                                                           | Cancer                     | Formimine (prodrug)             | Irreversible       | Purines (N7)                    |
| Cefprozil         | Cefzil                   | Corden Pharma        | 1991 | PBP                                                | Bacterial infections                                                     | Anti-microbial             | $\beta$ -lactam                 | Slowly reversible* | Ser                             |
| Finasteride       | Proscar                  | Merck                | 1992 | 5-alpha-reductase                                  | Symptomatic benign prostatic hyperplasia                                 | Cancer                     | Acrilamide                      | Reversible*        | NADH                            |
| Tazobactam        | Zosyn                    | Wyeth Pharms         | 1993 | $\beta$ -lactamases                                | Bacterial infections                                                     | Anti-microbial             | $\beta$ -lactam (suicidal)      | Irreversible       | Ser                             |
| Lansoprazole      | Prevacid                 | Takeda               | 1995 | H+/K+ ATPase                                       | Esophageal reflux and heartburn                                          | Gastro-intestinal diseases | Sulfenic acid (prodrug)         | Irreversible       | Cys                             |
| Gemcitabine       | Gemzar                   | Lilly                | 1996 | Ribonucleoside reductatase                         | Non-small cell lung cancer, pancreatic cancer, breast and ovarian cancer | Cancer                     | Geminal difluoride <sup>f</sup> | Irreversible       | Cys                             |
| Fosfomycin        | Monurol                  | Zambon               | 1996 | UDP-N-acetylgluco-samine-3-enolpyruvyl-transferase | Bacterial infections                                                     | Anti-microbial             | Epoxide                         | Irreversible       | Cys                             |
| Meropenem         | Merrem                   | Pfizer               | 1996 | PBP                                                | Bacterial infections                                                     | Anti-microbial             | $\beta$ -lactam                 | Slowly reversible* | Ser                             |
| Clopidogrel       | Plavix                   | Sanofi               | 1997 | P2Y12, platelet purinergic receptor                | Reduction of risk for stroke and heart attack                            | Cardiovascular diseases    | Thiol (prodrug)                 | Irreversible       | Cys                             |
| Cefdinir          | Omnicef                  | Abbvie               | 1997 | PBP                                                | Bacterial infections                                                     | Anti-microbial             | $\beta$ -lactam                 | Slowly reversible* | Ser                             |
| Capecitabine      | Xeloda                   | Roche                | 1998 | Thymidylate synthase                               | Dukes' C colon cancer                                                    | Cancer                     | Dihydro-pyrimidinedione         | Irreversible       | Cys, Tetrahydrofolate cofactor  |
| Rabeprazole       | Aciphex                  | Eisai                | 1999 | H+/K+ ATPase                                       | Esophageal reflux and heartburn                                          | Gastro-intestinal diseases | Sulfenic acid (prodrug)         | Irreversible       | Cys                             |
| Exemestane        | Aromasin                 | Pharmacia and Upjohn | 1999 | Aromatase                                          | Breast cancer                                                            | Cancer                     | Cyclohexadienone (suicidal)     | Irreversible       | Heme-iron, nucleophilic residue |
| Temozolomide      | Temodar                  | Merck                | 1999 | DNA (alkylation)                                   | Glioblastoma, astrocytoma                                                | Cancer                     | Methyldiazonium (prodrug)       | Irreversible       | Purines (N7)                    |
| Orlistat          | Xenical                  | Cheplapharm          | 1999 | Lipases                                            | Hyperlipidemia                                                           | Gastro-intestinal diseases | $\beta$ -lactone                | Reversible         | Ser                             |
| Pantoprazole      | Protonix                 | Wyeth Pharms         | 2000 | H+/K+ ATPase                                       | Esophageal reflux and heartburn                                          | Gastro-intestinal diseases | Sulfenic acid (prodrug)         | Irreversible       | Cys                             |
| Rivastigmine      | Exelon                   | Novartis             | 2000 | Acetylcholinesterase, butyrylcholinesterase        | Dementia/Parkinson's disease                                             | CNS diseases               | Carbamate                       | Slowly reversible  | Ser                             |
| Esomeprazole      | Nexium                   | Astrazeneca          | 2001 | H+/K+ ATPase                                       | Esophageal reflux and heartburn                                          | Gastro-intestinal diseases | Sulfenic acid (prodrug)         | Irreversible       | Cys                             |
| Dutasteride       | Avodart                  | GSK                  | 2001 | 5-alpha-reductase                                  | Symptomatic benign prostatic hyperplasia                                 | Cancer                     | Acrilamide                      | Irreversible       | NADH                            |
| Oxaliplatin       | Eloxatin                 | Sanofi               | 2002 | DNA (crosslinker)                                  | Colon cancer                                                             | Cancer                     | Pt (II)                         | Irreversible       | Purines (N7)                    |
| Bortezomib        | Velcade                  | Millennium Pharms    | 2003 | Proteasome                                         | Multiple myeloma                                                         | Cancer                     | Boronic acid                    | Slowly reversible  | Thr                             |
| Azacitidine       | Vidaza                   | Celgene              | 2004 | DNA methyltransferase                              | Myelodysplastic syndrome                                                 | Cancer                     | Triazinone (suicidal)           | Irreversible       | Cys                             |

|                     |           |                                              |      |                              |                                                                                  |                     |                                                      |                    |                           |
|---------------------|-----------|----------------------------------------------|------|------------------------------|----------------------------------------------------------------------------------|---------------------|------------------------------------------------------|--------------------|---------------------------|
| Decitabine          | Dacogen   | Otsuka Pharm Co LTD                          | 2006 | DNA methyltransferase        | Myelodysplastic syndrome                                                         | Cancer              | Triazinone (suicidal)                                | Irreversible       | Cys                       |
| Rasagiline          | Azilect   | Teva                                         | 2006 | MAO-B                        | Parkinson's disease                                                              | CNS diseases        | Propargylamine (suicidal)                            | Irreversible       | FAD (N5)                  |
| Bendamustine        | Treanda   | Cephalon                                     | 2008 | DNA (alkylation)             | Chronic lymphocytic leukemia (CLL), multiple myeloma, and non-Hodgkin's lymphoma | Cancer              | Aziridinium (prodrug)                                | Irreversible       | Purines (N7)              |
| Vigabatrin          | Sabril    | Lundbeck Pharms LLC                          | 2009 | GABA-aminotransferase        | Anti-epileptic                                                                   | CNS diseases        | Allylamine (suicidal)                                | Irreversible       | PLP cofactor, Lys         |
| Saxagliptin         | Onglyza   | Astrazeneca                                  | 2009 | DPP4                         | Diabetes                                                                         | Diabetes            | Nitrile                                              | Reversible         | Ser                       |
| Ceftaroline fosamil | Teflaro   | Cerexa                                       | 2010 | PBP                          | Skin and skin-structure infections; community acquired pneumonia                 | Anti-microbial      | $\beta$ -lactam                                      | Slowly reversible* | Ser                       |
| Abiraterone         | Zytiga    | Centocor Ortho Biotech                       | 2011 | CYP17                        | Metastatic castration-resistant prostate cancer                                  | Cancer              | Pyridine                                             | Irreversible       | Heme-iron (semi-covalent) |
| Boceprevir          | Victrelis | Merck & Co.                                  | 2011 | NS3/4A                       | HCV genotype 1                                                                   | Anti-microbial      | $\alpha$ -ketoamide                                  | Reversible         | Ser                       |
| Telaprevir          | Incivek   | Vertex                                       | 2011 | NS3/4A                       | HCV genotype 2                                                                   | Anti-microbial      | $\alpha$ -ketoamide                                  | Reversible         | Ser                       |
| Carfilzomib         | Kyprolis  | Onyx                                         | 2012 | Proteasome                   | Multiple myeloma                                                                 | Cancer              | Epoxyketone                                          | Irreversible       | Thr                       |
| Ibrutinib           | Imbruvica | Pharmacyclics                                | 2013 | BTK                          | Mantle cell lymphoma                                                             | Cancer              | Acrylamide                                           | Irreversible       | Cys                       |
| Afatinib            | Gilotrif  | Boehringer Ingelheim                         | 2013 | EGFR, HER2 and HER4          | Metastatic NSCLC with EGFR exon 19 deletions or exon 21 (L858R)                  | Cancer              | Acrylamide                                           | Irreversible       | Cys                       |
| Dimethyl fumarate   | Tecfidera | Biogen Idec                                  | 2013 | RSK2 (proposed) <sup>b</sup> | Relapsing forms of multiple sclerosis                                            | CNS diseases        | Fumarate                                             | Irreversible       | Cys                       |
| Ceftolozane         | Zerbaxa   | Cubist                                       | 2014 | PBP                          | Complicated intra-abdominal infections and complicated urinary tract infections  | Anti-microbial      | $\beta$ -lactam                                      | Slowly reversible* | Ser                       |
| Osimertinib         | Tagrisso  | AstraZeneca                                  | 2015 | EGFR                         | NSCLC with EGFR <sup>T790M</sup> mutations                                       | Cancer              | Acrylamide                                           | Irreversible       | Cys                       |
| Trabectedin         | Yondelis  | Johnson & Johnson                            | 2015 | DNA (alkylation)             | Liposarcoma or leiomyosarcoma                                                    | Cancer              | Highly reactive carbinolamine (imine intermediate)   | Reversible         | Guanine (N2)              |
| Avibactam           | Avycaz    | Allergan                                     | 2015 | $\beta$ -lactamases          | Complicated intra-abdominal infections and complicated urinary tract infections  | Anti-microbial      | (ureidooxy)sulfonic acid in diazabicyclooctanes core | Slowly reversible* | Ser                       |
| Ixazomib            | Ninlaro   | Takeda                                       | 2015 | Proteasome                   | Multiple myeloma                                                                 | Cancer              | Boronic acid                                         | Slowly reversible  | Thr                       |
| Acalabrutinib       | Calquence | AstraZeneca/Acerta Pharma                    | 2017 | BTK                          | Mantle cell lymphoma                                                             | Cancer              | 2-butynamide                                         | Irreversible       | Cys                       |
| Neratinib           | Nerlynx   | Puma Biotechnology                           | 2017 | EGFR, HER2 and HER4          | HER2-overexpressed breast cancer                                                 | Cancer              | Acrylamide                                           | Irreversible       | Cys                       |
| Vaborbactam         | Vabomere  | The Medicines Company/Rempex Pharmaceuticals | 2017 | $\beta$ -lactamases          | Complicated urinary tract infections                                             | Anti-microbial      | Boronic acid                                         | Reversible         | Ser                       |
| Vaborbactam         | Vabomere  | Rempex Pharms                                | 2017 | $\beta$ -lactamases          | Bacterial infections                                                             | Anti-microbial      | Boronic acid                                         | Reversible         | Ser                       |
| Dacomitinib         | Vizimpro  | Pfizer                                       | 2018 | EGFR                         | EGFR-mutated NSCLC                                                               | Cancer              | Acrylamide                                           | Irreversible       | Cys                       |
| Zanubrutinib        | Brukinsa  | BeiGene                                      | 2019 | BTK                          | Mantle cell lymphoma                                                             | Cancer              | Acrylamide                                           | Irreversible       | Cys                       |
| Selinexor           | Xpovio    | Karyopharm Therapeutics                      | 2019 | Exportin 1 (XPO1)            | Multiple myeloma                                                                 | Cancer              | Acrylamide                                           | Slowly reversible  | Cys                       |
| Voxelotor           | Oxbryta   | Global Blood Therapeutics                    | 2019 | Hemoglobin                   | Sickle Cell Disease                                                              | Hematologic disease | Aldehyde                                             | Reversible         | N-term Val                |
| Cefiderocol         | Fetroja   | Shionogi                                     | 2019 | PBP                          | Complicated urinary tract infections                                             | Anti-microbial      | $\beta$ -lactam                                      | Slowly reversible* | Ser                       |
| Relebactam          | Recarbrio | Merck & Co.                                  | 2019 | $\beta$ -lactamases          | Complicated urinary tract and complicated intra-abdominal infections             | Anti-microbial      | (ureidooxy)sulfonic acid in diazabicyclooctanes core | Reversible*        | Ser                       |

<sup>a</sup> Data source: FDA database <sup>b</sup> Only the New Chemical Entity (NCE) approved in the specified year is reported for combination drugs (source: FDA database), <sup>c</sup> Refers to the original sponsor for FDA first approval (source: FDA database), <sup>d</sup> When a prodrug mechanism is entailed, the revealed warhead is reported, <sup>e</sup> Selenocysteine, <sup>f</sup> Cerqueira NMFS, Fernandes PA, Ramos MJ. Understanding ribonucleotide reductase inactivation by gemcitabine. Chem. - A Eur. J. 13(30), 8507–8515 (2007), <sup>g</sup> Andersen JL, Gesser B, Funder ED, et al. Dimethyl fumarate is an allosteric covalent inhibitor of the p90 ribosomal S6 kinases. Nat. Commun. 9(1), 1–8 (2018), \* Inhibitor is not recovered upon release from its target.
